# Supplementary material for: Pouch-Type Asymmetric Supercapacitor Based on Nickel–Cobalt Metal–Organic Framework
Source: MDPI journal article supplement (doi:10.3390/ma16062423), 2023-03-17
Supplement: s1 [file s1]

Supplementary Information

# Pouch-Type Asymmetric Supercapacitors Based on Nickel–Cobalt Metal–Organic Frameworks

Surya. V. Prabhakar Vattikuti <sup>1</sup>, Nguyen To Hoai <sup>2,3</sup>, Jie Zeng <sup>1</sup> and Rajavaram Ramaraghavulu <sup>4</sup>, Nam Nguyen Dang <sup>2,3</sup>, Jaesool Shim <sup>1</sup> and Christian M. Julien <sup>5</sup>

<sup>1</sup> School of Mechanical Engineering, Yeungnam University, 280 Daehak-Ro, Gyeongsan, Gyeongbuk, 712-749, South Korea

<sup>2</sup> Future Materials & Devices Lab., Institute of Fundamental and Applied Sciences, Duy Tan University, Ho Chi Minh City 700000, Vietnam

<sup>3</sup> The Faculty of Environmental and Chemical Engineering, Duy Tan University, Danang 550000, Vietnam

<sup>4</sup> Department of Physics, School of Applied Sciences, REVA University, Bangalore 560064, India

<sup>5</sup> Institut de Minéralogie, de Physique des Matériaux et de Cosmochimie (IMPMC), Sorbonne Université, CNRS-UMR 7590, 4 place Jussieu, 75252 Paris, France

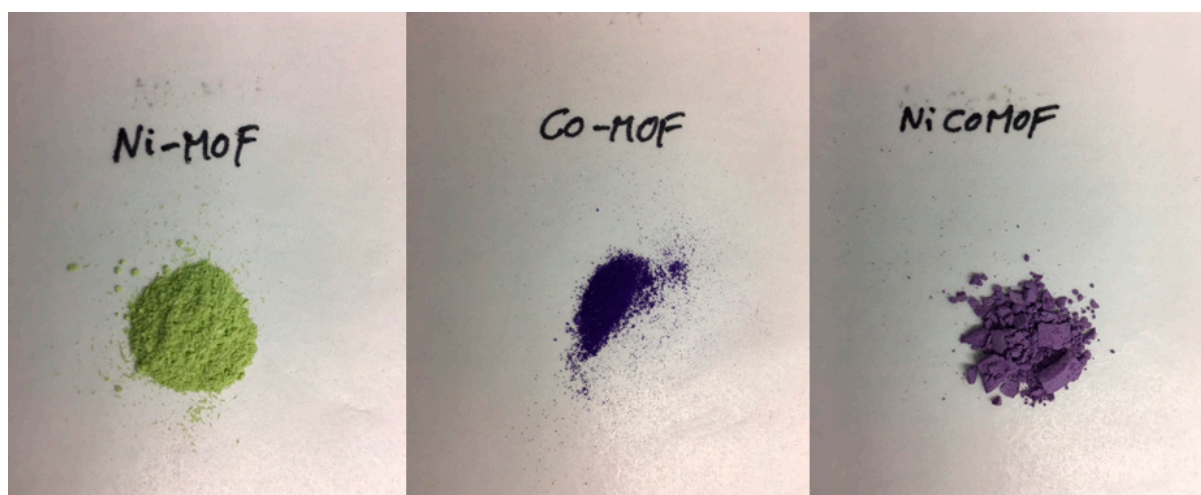

**Figure S1.** Photographs of Ni-MOF, Co-MOF and NiCo-MOF as-prepared powders via solvo-hydrothermal synthesis.

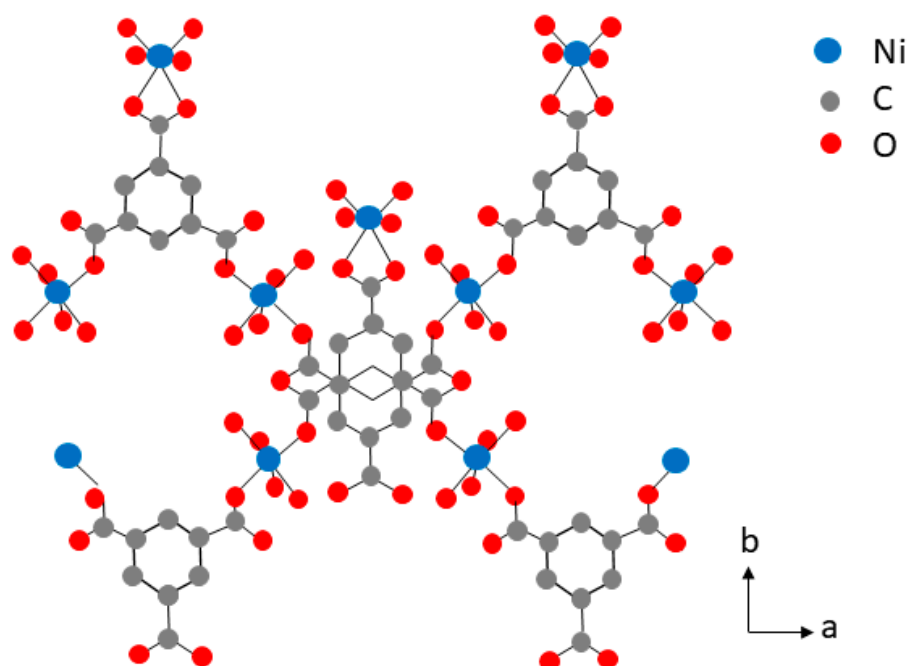

**Figure S2.** The suggested structure of the bimetal MOF framework with Ni as the metal centers surrounded by the organic linker.

**Table S1.** Comparison of BET surface area and of NCMF with values reported in the literature.

| Material      | Synthesis       | SSA<br>(m <sup>2</sup> g <sup>-1</sup> ) | Average<br>pore size<br>(nm) | Ref.      |
|---------------|-----------------|------------------------------------------|------------------------------|-----------|
| Ni-Co(BDC)    | Microwave       | 50.8                                     | -                            | [1]       |
| Ni-Co(BDC)    | Hydrothermal    | 70.7                                     | 2-20                         | [2]       |
| Ni(BTC)       | Electrochemical | 22.8                                     | 3-10                         | [3]       |
| Ni-Co(BTC)    | Hydrothermal    | 126.6                                    | 2.3                          | [4]       |
| Co(BTC)       | Hydrothermal    | 31.9                                     | 3                            | [5]       |
| Ni-Co(tp+pyz) | Hydrothermal    | 775                                      | 0.85                         | [6]       |
| Ni-Co(tp)     | Hydrothermal    | 22                                       | 2.2                          | [7]       |
| Ni(BTC)       | Electrochemical | 7.8                                      | 3.3                          | [8]       |
| Ni-Co(BTC)    | Hydrothermal    | 75.0                                     | 17                           | this work |

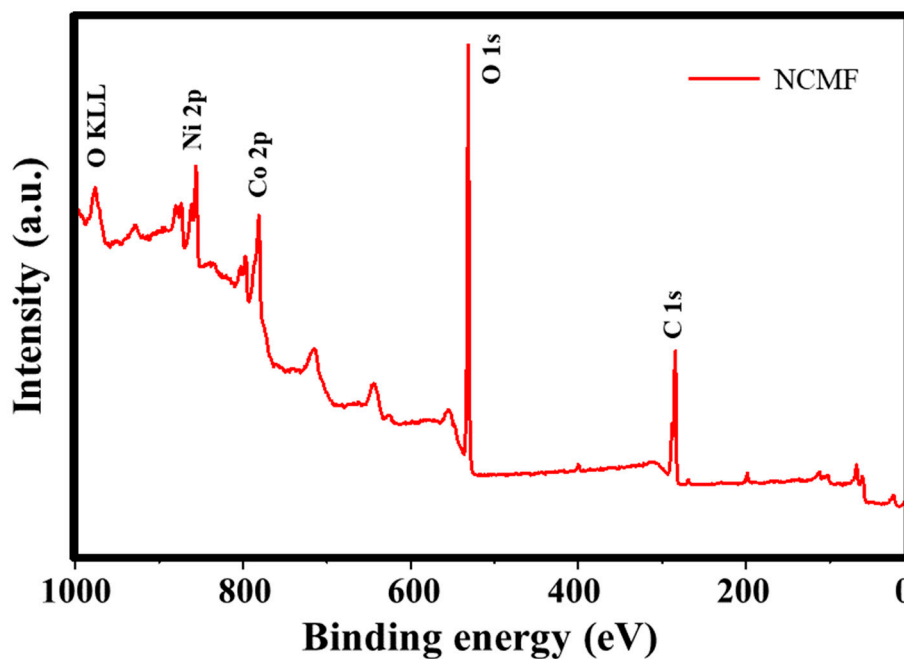

**Figure S3.** XPS survey scan of the NCMF nanostructure.

**Table S2.** Comparison of electrochemical performance with previous reports.

| Material                                     | Electrolyte | Performance<br>$C_s@rate$    | Ref.      |
|----------------------------------------------|-------------|------------------------------|-----------|
| Ni-Co-MOF (BTC)                              | 3 M KOH     | 900 F $g^{-1}@1 A g^{-1}$    | [9]       |
| CoNi( $\mu_3$ -tp) $_2$ ( $\mu_2$ -pyz) $_2$ | 3 M KOH     | 1049 F $g^{-1}@1 A g^{-1}$   | [10]      |
| Co/Ni-MOF (BDC)                              | 3 M KOH     | 236 mAh $g^{-1}@1 A g^{-1}$  | [11]      |
| Ni/Co-MOF-rGO (oba)                          | 6 M KOH     | 860 F $g^{-1}@1 A g^{-1}$    | [12]      |
| Ni/Co-based MOF (BDC)                        | 1 M KOH     | 827 C $g^{-1}@20 mA cm^{-2}$ | [13]      |
| Ni/Co-MOFs (BDC)                             | 3 M KOH     | 1126 F $g^{-1}@0.5 A g^{-1}$ | [14]      |
| Ni-MOF (BTC)                                 | 6 M KOH     | 750 F $g^{-1}@5 mV s^{-1}$   | [15]      |
| Ni-Co-MOF (BTC)                              | 1 M KOH     | 842 F $g^{-1}@1 A g^{-1}$    | This work |

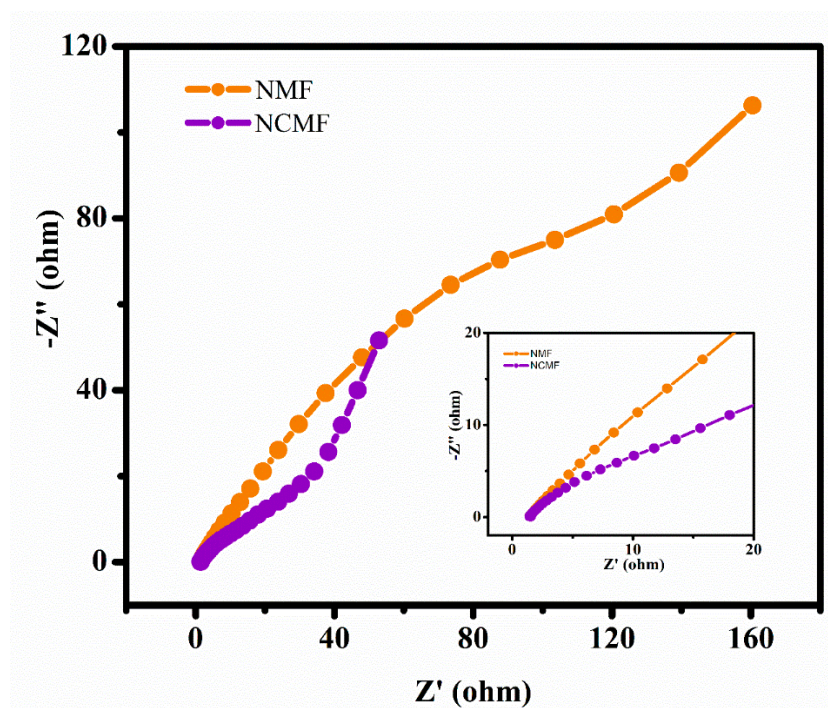

**Figure S4.** Nyquist plots of NMF and NCMF electrodes (inset shows the magnified image of Nyquist plots in the high-frequency range).

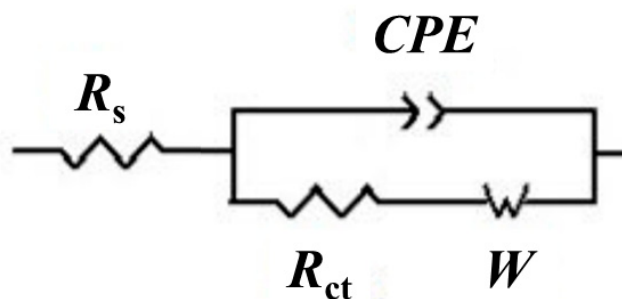

**Figure S5.** Randles equivalent circuit used for Nyquist plot fitting.  $R_s$  represents the ohmic electrolyte resistance,  $R_{ct}$  the charge transfer resistance,  $CPE$  is the constant phase element replacing the ideal double-layer capacitor ( $C_{dl}$ ) and  $W$  is the Warburg impedance.

**Table S3.** Comparison of electrochemical activity of NCMF electrode and other popular MOF-based electrodes in previous reports.

| Materials                    | Electrolyte                         | Scan rate or current density | Specific capacitance (F g <sup>-1</sup> ) | Ref.      |
|------------------------------|-------------------------------------|------------------------------|-------------------------------------------|-----------|
| Ni-CoMOF                     | 3 M KOH                             | 1 A g <sup>-1</sup>          | 236.1 mAh g <sup>-1</sup>                 | [16]      |
| ZIF-67/polypyrrole nanotubes | 1M Na <sub>2</sub> SO <sub>4</sub>  | 0.5 A g <sup>-1</sup>        | 597.6                                     | [17]      |
| Ni@CoNi-MOF                  | 6 M KOH                             | 1 A cm <sup>-2</sup>         | 772 C cm <sup>-2</sup>                    | [18]      |
| Ni-MOF-5/rGO                 | 1 M KOH                             | 1 mV s <sup>-1</sup>         | 758                                       | [19]      |
| ZIF-8/PANI                   | 1 M H <sub>2</sub> SO <sub>4</sub>  | 1 A g <sup>-1</sup>          | 236                                       | [20]      |
| Cu MOF/rGO                   | PVA-Na <sub>2</sub> SO <sub>4</sub> | 1 A g <sup>-1</sup>          | 385                                       | [21]      |
| Ni MOF-derived NPs/graphene  | 1 M H <sub>2</sub> SO <sub>4</sub>  | 1 A g <sup>-1</sup>          | 886                                       | [22]      |
| UIO-66/rGO                   | 6 M KOH                             | 0.15 A g <sup>-1</sup>       | 302                                       | [23]      |
| PANI-ZIF-67-CC               | 3 M KCl                             | 10 mV s <sup>-1</sup>        | 21.5 mF cm <sup>-2</sup>                  | [24]      |
| ZIF-67/rGO composite         | mixture <sup>a)</sup>               | 4.5 A g <sup>-1</sup>        | 1453                                      | [25]      |
| Co-MOF                       | 3 M KOH                             | 2 A g <sup>-1</sup>          | 958                                       | [5]       |
| Co-MOF                       | 5 M KOH                             | 1 A g <sup>-1</sup>          | 2564                                      | [26]      |
| Ni-MOF/CNTs                  | 3 M KOH                             | 1 A g <sup>-1</sup>          | 680 C g <sup>-1</sup>                     | [27]      |
| Ni-MOF                       | 6 M KOH                             | 5 mV s <sup>-1</sup>         | 750                                       | [15]      |
| Ni-MOF                       | 1 M KOH                             | 0.5 A g <sup>-1</sup>        | 414                                       | this work |
| Ni/Co-MOF                    | 1 M KOH                             | 0.5 A g <sup>-1</sup>        | 1213                                      | this work |

<sup>a)</sup>0.2 M K<sub>3</sub>[Fe(CN)<sub>6</sub>] + 1 M Na<sub>2</sub>SO<sub>4</sub>

## References

- Kurisingal, J.F.; Babu, R.; Kim, S.-H.; Li, Y.X.; Chang, J.-S.; Cho, S.J.; Park, D.-W. Microwave-induced synthesis of a bimetallic charge-transfer metal organic framework: a promising host for the chemical fixation of CO<sub>2</sub>. *Catal. Sci. Technol.* **2018**, *8*, 591–600.
- Liang, X.; Quan, B.; Chen, J.; Tang, D.; Zhang, B.; Ji, G. Strong electric wave response derived from the hybrid of lotus roots-like composites with tunable permittivity. *Sci. Rep.* **2017**, *7*, 9462.
- Cao, W.; Liu, Y.; Xu, F.; Li, J.; Li, D.; Du, G.; Chen, N. In situ electrochemical synthesis of rod-like Ni-MOFs as battery-type electrode for high performance hybrid supercapacitor. *J. Electrochem. Soc.* **2020**, *167*, 050503.
- Radhika, M.G.; Gopalakrishna, B.; Chaitra, K.; Gopalakrishna Bhatta, L.K.; Venkatesh, K.; Sudha Kamath, M.K.; Kathyayini, N. Electrochemical studies on Ni, Co & Ni/Co-MOFs for high-performance hybrid supercapacitors. *Mater. Res. Express* **2020**, *7*, 054003.
- Ramachandran, R.; Zhao, C.; Luo, D.; Wang, K.; Wang, F. Morphology-dependent electrochemical properties of cobalt-based metal organic frameworks for supercapacitor electrode materials. *Electrochim. Acta* **2018**, *267*, 170–180.
- Gholipour-Ranjbar, H.; Soleimani, M.; Naderi, H.R. Application of Ni/Co-based metal-organic frameworks (MOFs) as an advanced electrode material for supercapacitors. *New J. Chem.* **2016**, *40*, 9187–9193.
- Wang, J.; Zhong, Q.; Zeng, Y.; Cheng, D.; Xiong, Y.; Bu, Y. Rational construction of triangle-like nickel-cobalt bimetallic metal-organic framework nanosheets arrays as battery-type electrodes for hybrid supercapacitors. *J. Colloid Interface Sci.* **2019**, *555*, 42–52.
- Jabarian, S.; Ghaffarinejad, A. Electrochemical synthesis of NiBTC metal organic framework thin layer on nickel foam: An efficient electrocatalyst for the hydrogen evolution reaction. *J. Inorg. Organometal. Polymers Mater.* **2019**, *29*, 1565–1574.
- Zhao, S.; Zeng, L.; Cheng, G.; Yu, L.; Zeng, H. Ni/Co-based metal-organic frameworks as electrode material for high performance supercapacitors. *Chinese Chem. Lett.* **2019**, *30*, 605–609.
- Gholipour-Ranjbar, H.; Soleimani, M.; Naderi, H.R. Application of Ni/Co-based metal-organic frameworks (MOFs) as an advanced electrode material for supercapacitors. *New J. Chem.* **2016**, *40*, 9187–9193.
- Jiao, Y.; Pei, J.; Chen, D.; Yan, C.; Hu, Y.; Zhang, Q.; Chen, G. Mixed-metallic MOF based electrode materials for high performance hybrid supercapacitors. *J. Mater. Chem. A* **2017**, *5*, 1094–1102.
- Rahmanifar, M.S.; Hesari, H.; Noori, A.; Masoomi, M.Y.; Morsali, A.; Mousavi, M.F. A dual Ni/Co-MOF-reduced graphene oxide nanocomposite as a high performance supercapacitor electrode material. *Electrochim. Acta* **2018**, *275*, 76–86.
- Xu, F.; Chen, N.; Fan, Z.; Du, G. Ni/Co-based metal organic frameworks rapidly synthesized in ambient environment for high energy and power hybrid supercapacitors. *Appl. Surf. Sci.* **2020**, *528*, 146920.

14. Sun, J.; Yu, X.; Zhao, S.; Chen, H.; Tao, K.; Han, L. Solvent-controlled morphology of amino-functionalized bimetal metal-organic frameworks for asymmetric supercapacitors. *Inorg. Chem.* **2020**, *59*, 11385–11395.
15. Li, X.; Li, J.; Zhang, Y.; Zhao, P.; Lei, R.; Yuan, B.; Xia, M. The evolution in electrochemical performance of honeycomb-like Ni(OH)<sub>2</sub> derived from MOF template with morphology as a high-performance electrode material for supercapacitors. *Materials* **2020**, *13*, 4870.
16. Jiao, Y.; Pei, J.; Chen, D.; Yan, C.; Hu, Y.; Zhang, Q.; Chen, G. Mixed-metallic MOF based electrode materials for high performance hybrid supercapacitors. *J. Mater. Chem. A* **2017**, *5*, 1094–1102.
17. Xu, X.; Tang, J.; Qian, H.; Hou, S.; Bando, Y.; Hossain, M.S.A.; Pan, L.; Yamauchi, Y. Three-dimensional networked metal-organic frameworks with conductive polypyrrole tubes for flexible supercapacitors. *ACS Appl. Mater. Interfaces* **2017**, *9*, 38737–38744.
18. Hong, M.; Zhou, C.; Xu, S.; Ye, X.; Yang, Z.; Zhang, L.; Zhou, Z.; Hu, N.; Zhang, Y. Bi-metal organic framework nanosheets assembled on nickel wire films for volumetric-energy-dense supercapacitors. *J. Power Sources* **2019**, *423*, 80–89.
19. Banerjee, P.C.; Lobo, D.E.; Middag, R.; Ng, W.K.; Shaibani, M.E.; Majumder, M. Electrochemical capacitance of Ni-doped metal organic framework and reduced graphene oxide composites: more than the sum of its parts. *ACS Appl. Mater. Interfaces* **2015**, *7*, 3655–3664.
20. Salunkhe, R.R.; Tang, J.; Kobayashi, N.; Kim, J.; Ide, Y.; Tominaka, S.; Kim, J.H.; Yamauchi, Y. Ultrahigh performance supercapacitors utilizing core-shell nanoarchitectures from a metalorganic framework-derived nanoporous carbon and a conducting polymer. *Chem. Sci.* **2016**, *7*, 5704–5713.
21. Srimuk, P.; Luanwuthi, S.; Krittayavathananon, A.; Sawangphruk, M. Solid-type supercapacitor of reduced graphene oxide-metal organic framework composite coated on carbon fiber paper. *Electrochim. Acta* **2015**, *157*, 69–77.
22. Wu, M.-S.; Hsu, W.-H. Nickel nanoparticles embedded in partially graphitic porous carbon fabricated by direct carbonization of nickel-organic framework for high-performance supercapacitors. *J. Power Sources* **2015**, *274*, 1055–1062.
23. Mao, M.L.; Sun, L.X.; Xu, F. Metal-organic frameworks/carboxyl graphene derived porous carbon as a promising supercapacitor electrode material. *Key Eng. Mater. Trans. Tech. Publ.* **2017**, 756–763.
24. Wang, L.; Feng, X.; Ren, L.; Piao, Q.; Zhong, J.; Wang, Y.; Li, H.; Chen, Y.; Wang, B. Flexible solid-state supercapacitor based on a metal-organic framework interwoven by electrochemically-deposited PANI. *J. Am. Chem. Soc.* **2015**, *137*, 4920–4923.
25. Sundriyal, S.; Shrivastav, V.; Kaur, H.; Mishra, S.; Deep, A. High-performance symmetrical supercapacitor with a combination of a ZIF-67/rGO composite electrode and a redox additive electrolyte. *ACS Omega* **2018**, *3*, 17348–17358.
26. Yang, J.; Ma, Z.; Gao, W.; Wei, M. Layered structural Co-based MOF with conductive network frames as a new supercapacitor electrode. *Chem.: A Eur. J.* **2017**, *23*, 631–636.
27. Ran, F.; Xu, Pan, D.; Liu, Y.; Bai, Y.; Shao, L. Ultrathin 2D metal-organic framework nanosheets in situ interpenetrated by functional CNTs for hybrid energy storage device. *Nano-Micro Lett.* **2020**, *12*, 46.
